# Supplementary material
Source: PubMed Central journal article supplement (PMC4995992)
Supplement: pnas.1524915113.sapp.pdf [file pnas.1524915113.sapp.pdf]

Figure S1

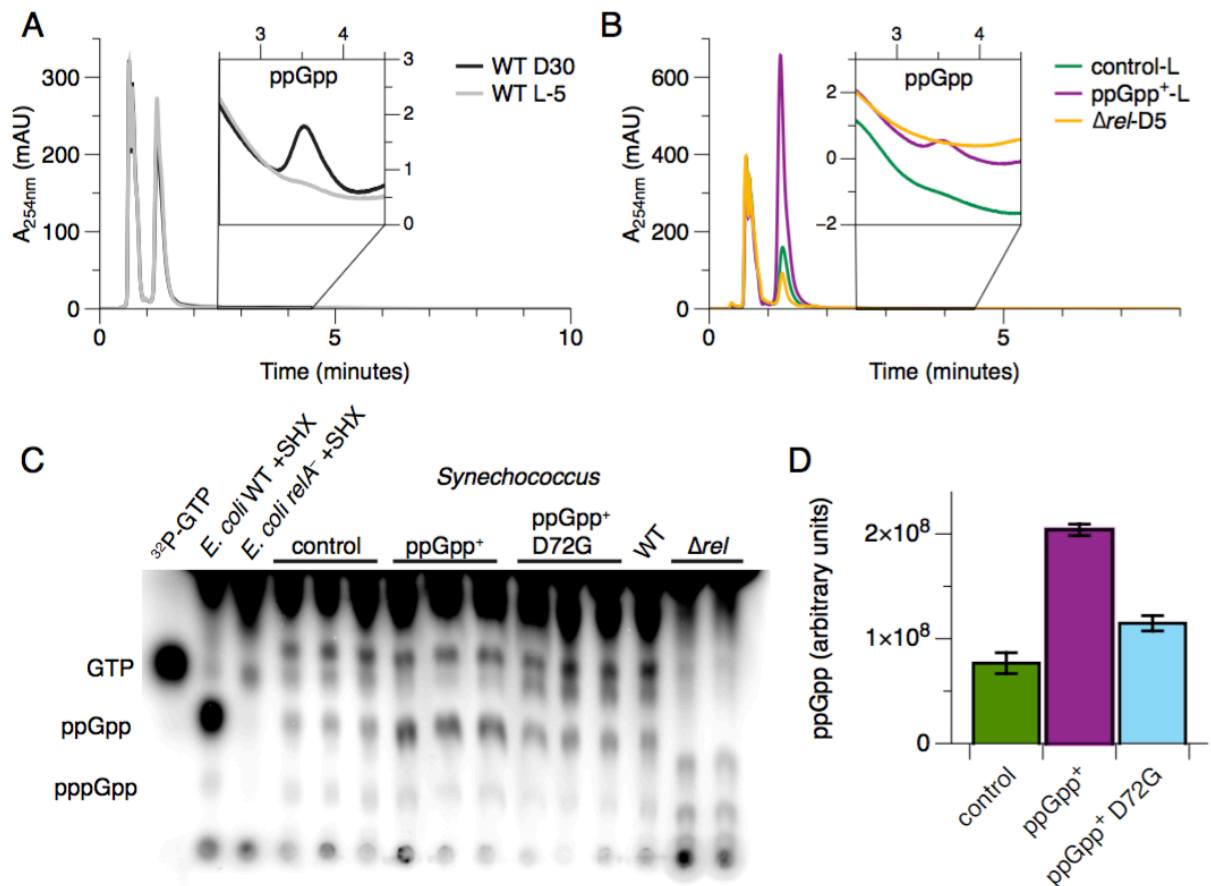

**Fig. S1.** Measurement of ppGpp in *Synechococcus* lysates by HPLC and  $^{32}\text{P}$ -TLC. (A, B) Representative traces from HPLC analysis. *Synechococcus* cell extracts were run on an anion exchange column, monitoring absorbance at 254 nm. Under these conditions, ppGpp elutes at  $\sim 3.5$  minutes, as shown in the enlarged plots. (A) Traces from experiment shown in Figure 1A. Gray line, wild-type (WT) cells in the light at  $t = -5$  minutes (5 minutes before shift to darkness); black line, wild-type cells after 30 minutes in the dark. (B) Traces from experiment shown in Figure 1B. Green line, control cells (WT- $\text{Cm}^{\text{R}}$ ) in the light; purple line, ppGpp $^{+}$  cells in the light after 17 hours of IPTG induction; yellow line,  $\Delta\text{rel}$  cells after 5 minutes in the dark. (C) *E. coli* and *Synechococcus* (control = WT- $\text{Kan}^{\text{R}}$ ) were grown in low-phosphate media to mid-log phase.  $\text{H}_3^{32}\text{PO}_4$ -containing media was added to cultures along with IPTG where appropriate, and they were incubated at  $30^{\circ}\text{C}$  for at least 1 generation time. *E. coli* cultures were treated with serine hydroxamate (SHX) to mimic amino acid starvation for 10 minutes before harvesting. Cells were washed to remove excess  $\text{H}_3^{32}\text{PO}_4$  and lysed in 6.5 M formic acid. Cell extracts and  $[\gamma\text{-}^{32}\text{P}]\text{-GTP}$  (a standard) were spotted onto PEI-cellulose TLC plates, run in 1.5 M  $\text{KH}_2\text{PO}_4$  (pH 3.4) for 30 minutes, and exposed to a phosphorscreen for 24 hours. Imaging and quantitation were performed using a Typhoon phosphorimager. (D) Quantitation of ppGpp spot intensities from TLC plate shown in panel C. Data are presented as mean  $\pm$  SD ( $n = 3$ ).

Figure S2

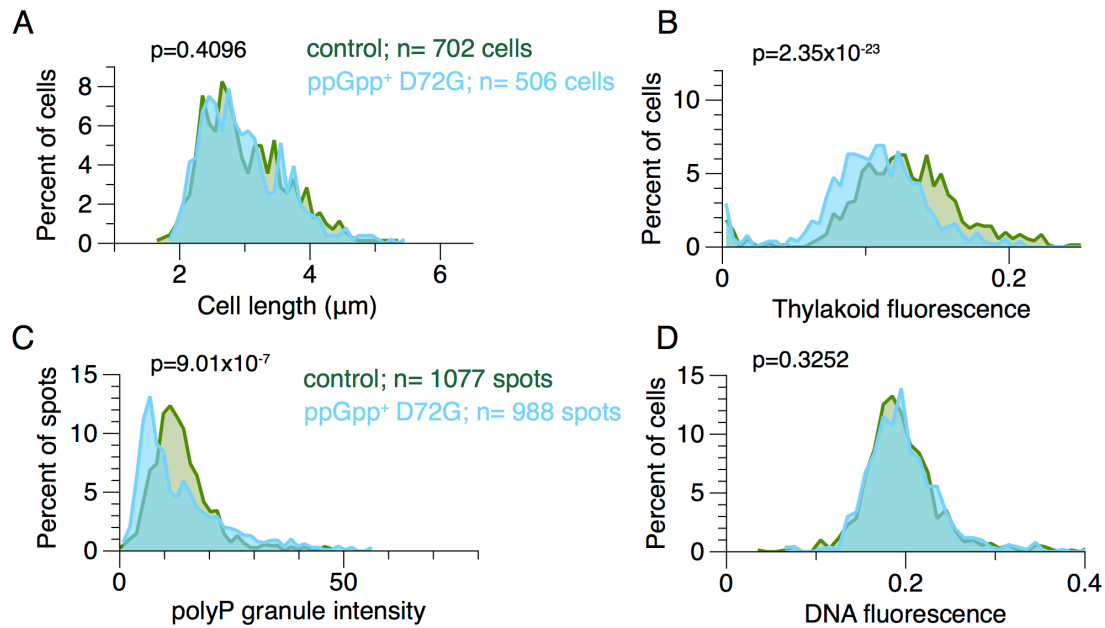

**Fig. S2.** The phenotypes of ppGpp<sup>+</sup> D72G cells are similar to those of a wild-type control strain. Microscopy images were analyzed using MicrobeTracker and SpotFinder, bacterial image analysis programs written in Matlab. Images were acquired from two independent cultures at 26 hours after induction with 50  $\mu\text{M}$  IPTG, as in Figure 2. Histogram colors are the same in all panels: green, control; light blue, ppGpp<sup>+</sup> D72G. The same number of cells (control: n = 702 cells; ppGpp<sup>+</sup> D72G: n = 506 cells) was used for each analysis shown. Data were analyzed with the Mann-Whitney U-test, and p-values are indicated on the histograms.

Figure S3

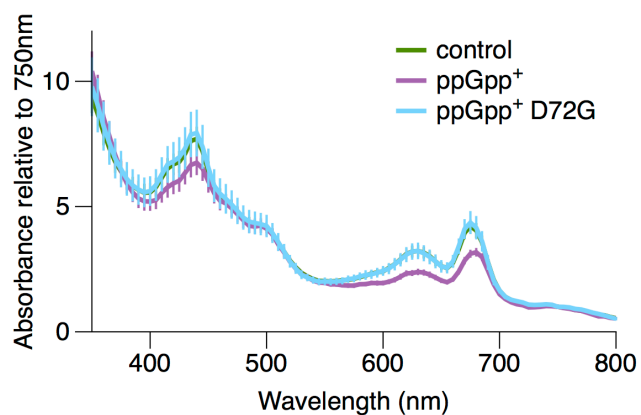

**Fig. S3.** (p)ppGpp induces chlorosis (bleaching) in *Synechococcus*. *Synechococcus* cultures of the indicated strains were grown to mid-log phase and induced with 50  $\mu$ M IPTG for 44 hours. Absorbance scans of cultures were performed using a Tecan M1000 plate reader, reading absorbance between 350-800 nm at 5 nm intervals. An identical absorbance scan was performed using sterile media, and these values were subtracted from culture readings. Spectra from the control and ppGpp<sup>+</sup> D72G strains are nearly identical and are therefore hard to resolve. Data are presented as mean  $\pm$  SD (n = 3).

Figure S4

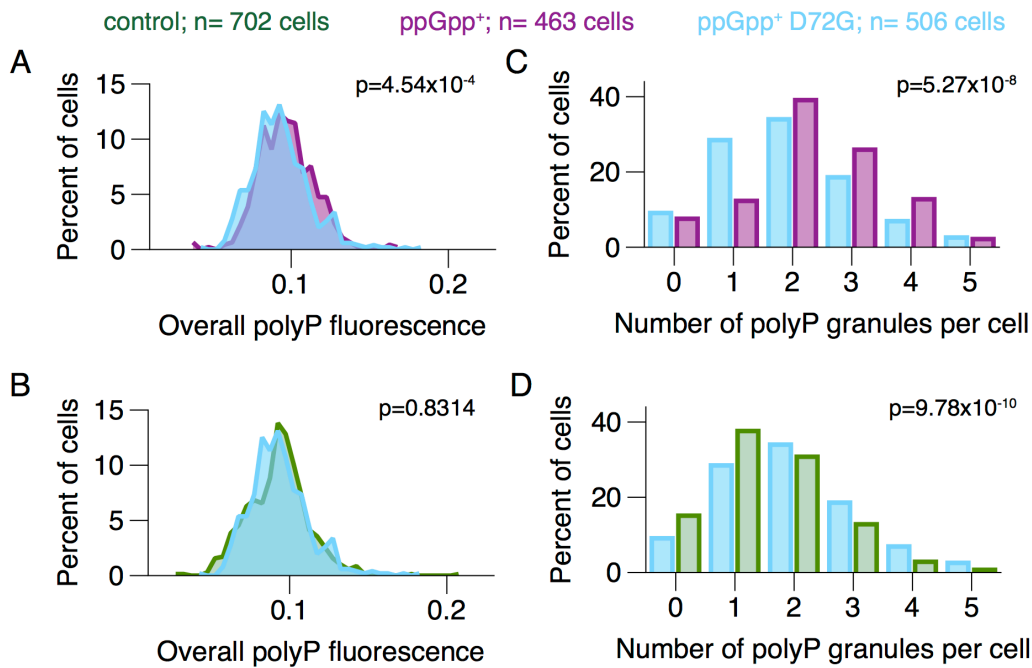

**Fig. S4.** (p)ppGpp does not dramatically change overall polyP levels when normalized to cell area, but has a slight effect on polyP granule number. Microscopy images were analyzed using MicrobeTracker and SpotFinder. Images were acquired from two independent cultures at 26 hours after induction with 50  $\mu$ M IPTG, as in Figure 2. Histogram colors are the same in all panels: green, control; purple, ppGpp<sup>+</sup>; light blue, ppGpp<sup>+</sup> D72G. The same number of cells (control: n = 702 cells; ppGpp<sup>+</sup>: n = 463 cells; ppGpp<sup>+</sup> D72G: n = 506 cells) was used for each analysis shown. Data were analyzed with the Mann-Whitney U-test, and p-values are indicated on the histograms. (A, B) Histograms of overall polyP fluorescence (AU; normalized to cell area) in control, ppGpp<sup>+</sup>, and ppGpp<sup>+</sup> D72G cultures. A CFP filter set (excitation 436 nm; emission 480 nm) was used to image DAPI-polyP fluorescence; at these wavelengths, DAPI-DNA fluorescence signal is negligible. (C, D) Higher (p)ppGpp levels slightly increase the number of polyP granules in *Synechococcus*. Histograms show the number of polyP granules present per cell in each strain.

Figure S5

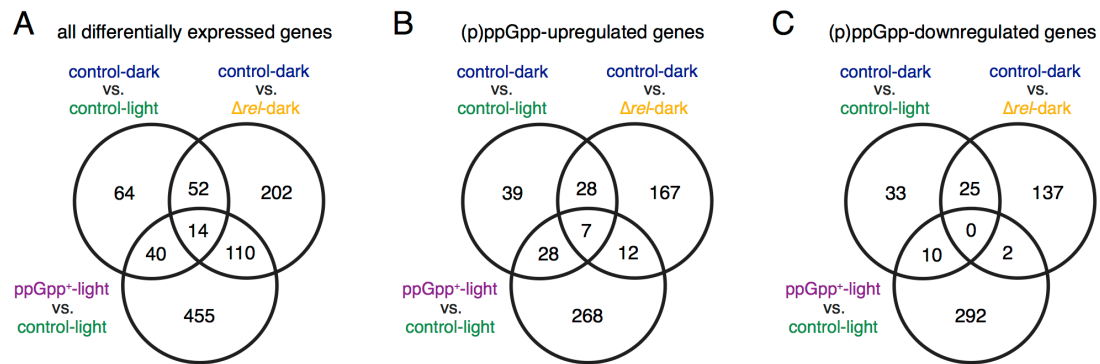

**Fig. S5.** Venn diagrams comparing (p)ppGpp-regulated genes across RNA-seq comparisons. (A) Overlap among all differentially expressed genes across comparisons. (B) Overlap among genes upregulated by (p)ppGpp across comparisons. Genes included here showed expression values at least one standard deviation higher than calculated based on the regression line. See Table S1 for a list of the 7 genes consistently upregulated by (p)ppGpp across all three comparisons. (C) Overlap among genes downregulated by (p)ppGpp across comparisons. Genes included here showed expression values at least one standard deviation lower than calculated based on the regression line. See Tables S2 and S3 for lists of the 75 genes upregulated or 37 genes downregulated, respectively, by (p)ppGpp in at least two comparisons.

Figure S6

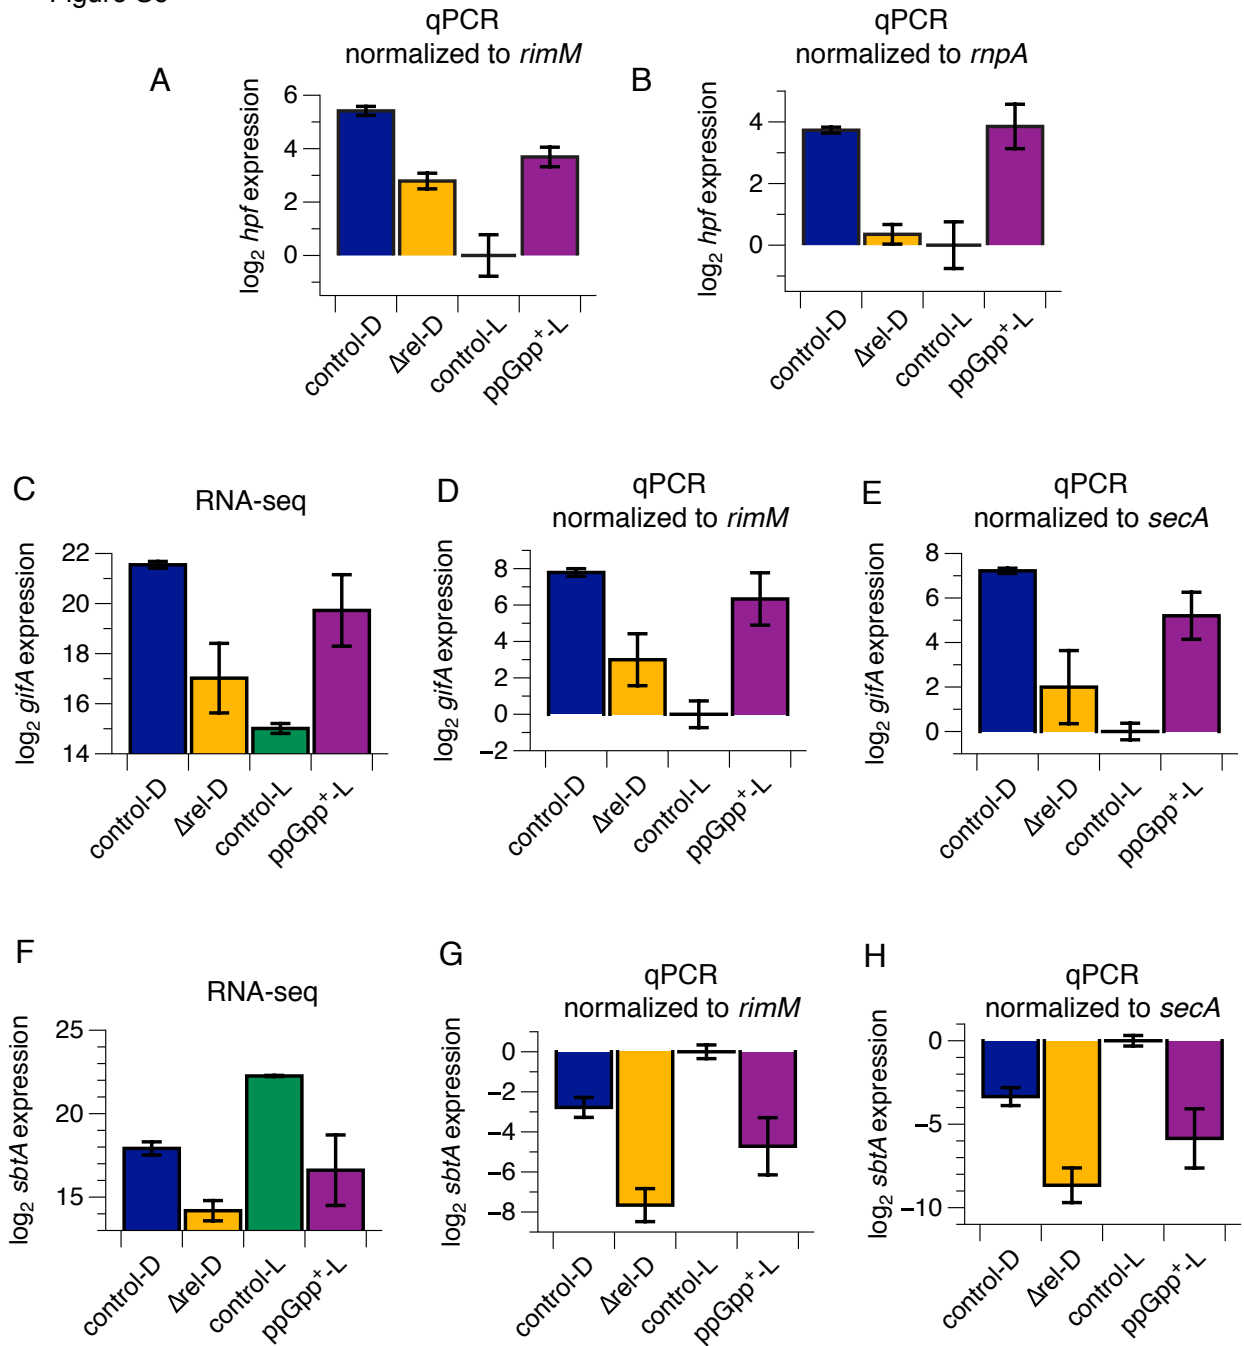

**Fig. S6.** Verification of *hpf*, *gifA*, and *sbtA* gene regulation by qPCR. Three candidate reference genes were selected for qPCR after confirming similar expression levels across conditions from our RNA-seq data. All data are presented as mean  $\pm$  SEM ( $n = 4$  biological replicates). (A) *hpf* expression normalized to *rimM* expression and plotted on a  $\log_2$  scale relative to control-L. (B) *hpf* expression normalized to *rnpA* expression and plotted on a  $\log_2$  scale relative to control-L. (C) Rockhopper-normalized *gifA* expression values from RNA-seq, plotted on a  $\log_2$  scale. (D) *gifA* expression normalized to *rimM* expression and plotted on a  $\log_2$  scale relative to control-L. (E) *gifA* expression normalized to *secA* expression and plotted on a  $\log_2$  scale relative to control-L. (F) Rockhopper-normalized *sbtA* expression values from RNA-seq, plotted on a  $\log_2$  scale. (G) *sbtA* expression normalized to *rimM* expression and plotted on a  $\log_2$  scale relative to control-L. (H) *sbtA* expression normalized to *secA* expression and plotted on a  $\log_2$  scale relative to control-L.

Figure S7

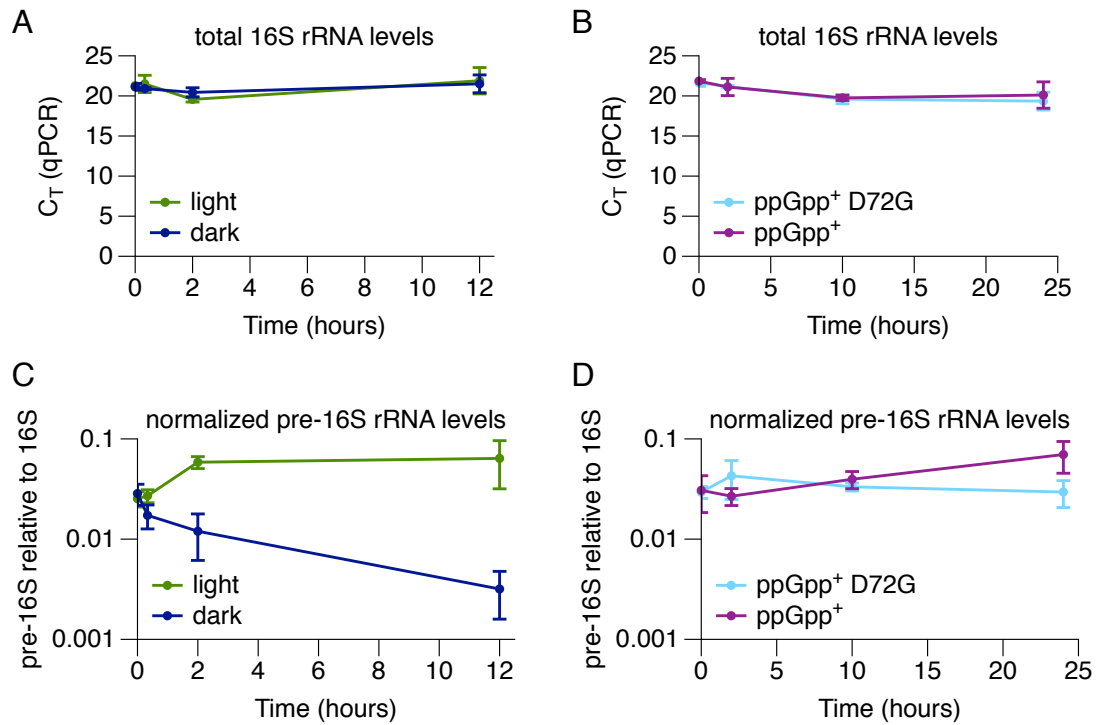

**Fig. S7.** Levels of ribosomal RNA precursors decrease in the dark, but do not decrease in the ppGpp<sup>+</sup> strain. For the indicated conditions, RNA was isolated, reverse transcribed, and qPCR was performed to amplify sequences from mature 16S rRNAs and pre-16S rRNAs (primers within the 5' leader sequence of the rRNA transcript, which is cleaved during rRNA maturation). All data are presented as mean  $\pm$  SD ( $n = 3$  biological replicates). (A, B) Total 16S rRNA levels are plotted as the threshold cycle ( $C_T$ ) measured by qPCR, and do not change measurably under any of the indicated conditions. (C, D) Pre-16S rRNA levels are plotted relative to total 16S rRNA levels from the same sample (using the calculation  $2^{(16S C_T - \text{pre-16S } C_T)}$ ). Levels of pre-16S rRNAs decrease over time when cells are incubated in the dark (C; dark begins at time = 0 hours), but are not affected by induction of high (p)ppGpp levels in the ppGpp<sup>+</sup> strain (D; cultures were induced with 50  $\mu$ M IPTG at time = 0 hours).

Figure S8

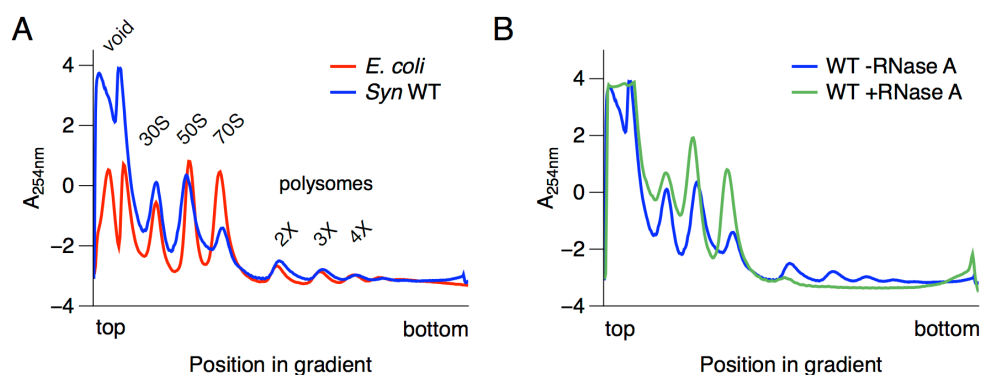

**Fig. S8.** Verification of ribosomal peak identities in polysome traces. (A, B) Polysome profiles from *E. coli* and *Synechococcus* lysates analyzed by sucrose density gradient centrifugation. Cultures were grown to mid-log phase (in constant light for *Synechococcus*). Two minutes before harvesting, all cultures were treated with chloramphenicol at 0.5 mg/ml to arrest translation elongation and were rapidly cooled on ice before centrifugation. Cells were lysed shortly before preparation of 10-40% sucrose gradients, ultracentrifugation, and analysis. Abundance of RNA species was monitored by absorbance at 254 nm ( $A_{254nm}$ ). (A) Comparison of *E. coli* and wild-type *Synechococcus* (*Syn*) polysome traces. Top labels indicate the identity of each peak. (B) Treatment of wild-type *Synechococcus* lysates with RNase A confirms the identity of polysome peaks. *Synechococcus* lysates were treated with RNase A for 10 minutes to cleave mRNAs linking polysomes before continuing with the sucrose density gradient centrifugation protocol.



Table S1. Genes upregulated by (p)ppGpp across all three RNA-seq comparisons.

| locus tag       | gene name        | gene description                                         | RNA-seq expression values |                 |           |                       |
|-----------------|------------------|----------------------------------------------------------|---------------------------|-----------------|-----------|-----------------------|
|                 |                  |                                                          | control-D                 | $\Delta reI$ -D | control-L | ppGpp <sup>+</sup> -L |
| Synpcc7942_0182 |                  | hypothetical protein                                     | 135                       | 43              | 10        | 41                    |
| Synpcc7942_0900 | <i>gifA</i>      | hypothetical protein                                     | 15228                     | 3075            | 166       | 7825                  |
| Synpcc7942_1212 |                  | hypothetical protein                                     | 77                        | 21              | 8         | 30                    |
| Synpcc7942_1724 |                  | hypothetical protein                                     | 97                        | 18              | 27        | 866                   |
| Synpcc7942_2352 | <i>lrtA</i>      | sigma 54 modulation protein / SSU ribosomal protein S30P | 27694                     | 4836            | 1073      | 8799                  |
| Synpcc7942_2411 |                  | hypothetical protein                                     | 108                       | 31              | 19        | 83                    |
| Synpcc7942_2412 | <i>phb, hflC</i> | SPFH domain, Band 7 family protein                       | 337                       | 83              | 35        | 126                   |

Table S2. Genes upregulated by (p)ppGpp across at least two RNA-seq comparisons.

| locus tag       | gene name                  | gene description                                                   | RNA-seq expression values |                |           |                       |
|-----------------|----------------------------|--------------------------------------------------------------------|---------------------------|----------------|-----------|-----------------------|
|                 |                            |                                                                    | control-D                 | $\Delta$ rel-D | control-L | ppGpp <sup>+</sup> -L |
| Synpcc7942_0049 | <i>pilA</i>                | pilin polypeptide PilA-like                                        | 36111                     | 2658           | 14369     | 62878                 |
| Synpcc7942_0108 |                            | sulfiredoxin                                                       | 62                        | 5              | 10        | 6                     |
| Synpcc7942_0147 |                            | hypothetical protein                                               | 453                       | 209            | 78        | 237                   |
| Synpcc7942_0182 |                            | hypothetical protein                                               | 135                       | 43             | 10        | 41                    |
| Synpcc7942_0193 |                            | hypothetical protein                                               | 723                       | 221            | 58        | 244                   |
| Synpcc7942_0195 |                            | hypothetical protein                                               | 3918                      | 585            | 67        | 121                   |
| Synpcc7942_0196 |                            | Beta-carotene 15,15'-dioxygenase                                   | 622                       | 109            | 39        | 44                    |
| Synpcc7942_0243 | <i>hliC</i>                | possible high light inducible polypeptide HliC                     | 1012                      | 215            | 392       | 9045                  |
| Synpcc7942_0251 |                            | Exonuclease                                                        | 941                       | 400            | 40        | 244                   |
| Synpcc7942_0252 | <i>cp12</i>                | hypothetical protein                                               | 14391                     | 5430           | 363       | 2738                  |
| Synpcc7942_0253 |                            | hypothetical protein                                               | 6310                      | 383            | 106       | 119                   |
| Synpcc7942_0267 | <i>gidB</i>                | glucose-inhibited division protein B                               | 3005                      | 933            | 105       | 534                   |
| Synpcc7942_0291 |                            | hypothetical protein                                               | 853                       | 121            | 118       | 141                   |
| Synpcc7942_0316 | <i>digD, orf7.5</i>        | hypothetical protein                                               | 4333                      | 370            | 705       | 426                   |
| Synpcc7942_0398 |                            | hypothetical protein                                               | 369                       | 77             | 222       | 607                   |
| Synpcc7942_0465 |                            | hypothetical protein                                               | 640                       | 83             | 127       | 140                   |
| Synpcc7942_0497 |                            | hypothetical protein                                               | 186                       | 110            | 41        | 145                   |
| Synpcc7942_0623 | <i>trxB</i>                | thioredoxin reductase                                              | 696                       | 107            | 100       | 82                    |
| Synpcc7942_0700 |                            | hypothetical protein                                               | 5329                      | 1310           | 546       | 1007                  |
| Synpcc7942_0741 |                            | Phage tail protein I                                               | 4                         | 8              | 1         | 8                     |
| Synpcc7942_0781 | <i>ppsA, pps</i>           | phosphoenolpyruvate synthase                                       | 1840                      | 659            | 46        | 144                   |
| Synpcc7942_0801 | <i>sodB, sod1</i>          | Superoxide dismutase                                               | 1227                      | 268            | 916       | 1761                  |
| Synpcc7942_0834 |                            | hypothetical protein                                               | 106                       | 83             | 10        | 76                    |
| Synpcc7942_0900 | <i>gifA</i>                | hypothetical protein                                               | 15228                     | 3075           | 166       | 7825                  |
| Synpcc7942_0905 |                            | hypothetical protein                                               | 128755                    | 83391          | 4074      | 42319                 |
| Synpcc7942_0906 |                            | hypothetical protein                                               | 2095                      | 2217           | 158       | 1882                  |
| Synpcc7942_1002 | <i>psaD</i>                | photosystem I reaction center subunit II                           | 17725                     | 3646           | 7833      | 8142                  |
| Synpcc7942_1089 | <i>clpB, clpB1, clpBI</i>  | ATPase                                                             | 444                       | 48             | 71        | 66                    |
| Synpcc7942_1120 |                            | hypothetical protein                                               | 20                        | 3              | 12        | 127                   |
| Synpcc7942_1147 |                            | hypothetical protein                                               | 44                        | 2              | 14        | 8                     |
| Synpcc7942_1150 |                            | hypothetical protein                                               | 290                       | 37             | 22        | 36                    |
| Synpcc7942_1153 | <i>digE</i>                | hypothetical protein                                               | 108                       | 11             | 11        | 10                    |
| Synpcc7942_1209 |                            | hypothetical protein                                               | 544                       | 224            | 99        | 282                   |
| Synpcc7942_1211 |                            | probable molybdopterin-guanine dinucleotide biosynthesis protein A | 101                       | 63             | 18        | 75                    |
| Synpcc7942_1212 |                            | hypothetical protein                                               | 77                        | 21             | 8         | 30                    |
| Synpcc7942_1302 |                            | hypothetical protein                                               | 3005                      | 273            | 133       | 143                   |
| Synpcc7942_1303 |                            | hypothetical protein                                               | 1424                      | 203            | 126       | 136                   |
| Synpcc7942_1314 | <i>ftsH</i>                | FtsH-2 peptidase. Metallo peptidase. MEROPS family M41             | 1586                      | 200            | 295       | 138                   |
| Synpcc7942_1320 |                            | hypothetical protein                                               | 201                       | 23             | 12        | 23                    |
| Synpcc7942_1373 |                            | hydrogenase accessory protein                                      | 2898                      | 538            | 565       | 1245                  |
| Synpcc7942_1389 | <i>psbAll, psbA, psbA2</i> | photosystem q(b) protein                                           | 27451                     | 2081           | 14196     | 16499                 |
| Synpcc7942_1426 | <i>rbcL</i>                | ribulose bisphosphate carboxylase                                  | 3935                      | 604            | 1668      | 3245                  |
| Synpcc7942_1427 | <i>rbcS</i>                | ribulose 1,5-bisphosphate carboxylase small subunit                | 9456                      | 1280           | 3089      | 7402                  |
| Synpcc7942_1460 |                            | hypothetical protein                                               | 476                       | 180            | 89        | 406                   |

|                  |                      |                                                          |       |      |      |      |
|------------------|----------------------|----------------------------------------------------------|-------|------|------|------|
| Synpcc7942_1542  | <i>isiA</i>          | iron-stress chlorophyll-binding protein                  | 203   | 33   | 51   | 79   |
| Synpcc7942_1646  |                      | hypothetical protein                                     | 1750  | 744  | 256  | 527  |
| Synpcc7942_1648  |                      | putative ferric uptake regulator, FUR family             | 511   | 43   | 50   | 35   |
| Synpcc7942_1649  |                      | rubrerythrin                                             | 1375  | 15   | 132  | 49   |
| Synpcc7942_1656  | <i>katG, cpx</i>     | catalase/oxidase HPI                                     | 531   | 278  | 42   | 345  |
| Synpcc7942_1689  | <i>rhdA, rhd</i>     | Rhodanese-like                                           | 94    | 8    | 26   | 4    |
| Synpcc7942_1722  | <i>sbpA</i>          | Thiosulphate-binding protein                             | 110   | 11   | 26   | 18   |
| Synpcc7942_1724  |                      | hypothetical protein                                     | 97    | 18   | 27   | 866  |
| Synpcc7942_1845  |                      | hypothetical protein                                     | 3582  | 1204 | 288  | 3809 |
| Synpcc7942_2043  | <i>speH</i>          | S-adenosylmethionine decarboxylase proenzyme             | 237   | 43   | 238  | 550  |
| Synpcc7942_2082  | <i>fus</i>           | elongation factor G                                      | 591   | 136  | 71   | 56   |
| Synpcc7942_2119  |                      | RNA methyltransferase TrmH, group 3                      | 634   | 124  | 559  | 1041 |
| Synpcc7942_2125  |                      | hypothetical protein                                     | 456   | 111  | 109  | 140  |
| Synpcc7942_2126  |                      | hypothetical protein                                     | 657   | 93   | 142  | 191  |
| Synpcc7942_2301  |                      | hypothetical protein                                     | 383   | 278  | 57   | 189  |
| Synpcc7942_2352  | <i>lrtA</i>          | sigma 54 modulation protein / SSU ribosomal protein S30P | 27694 | 4836 | 1073 | 8799 |
| Synpcc7942_2401  | <i>hspA, hsp16.6</i> | heat shock protein Hsp20                                 | 7874  | 255  | 87   | 90   |
| Synpcc7942_2411  |                      | hypothetical protein                                     | 108   | 31   | 19   | 83   |
| Synpcc7942_2412  | <i>phb, hflC</i>     | SPFH domain, Band 7 family protein                       | 337   | 83   | 35   | 126  |
| Synpcc7942_2478  | <i>psb28-2</i>       | photosystem II reaction center W protein                 | 1490  | 202  | 87   | 132  |
| Synpcc7942_2485  |                      | hypothetical protein                                     | 1233  | 419  | 102  | 383  |
| Synpcc7942_2486  |                      | hypothetical protein                                     | 1245  | 511  | 167  | 507  |
| Synpcc7942_2529  | <i>gifB</i>          | hypothetical protein                                     | 3874  | 1199 | 152  | 3766 |
| Synpcc7942_2600  | <i>ctaB, cyoE</i>    | protoheme IX farnesyltransferase                         | 354   | 125  | 46   | 218  |
| Synpcc7942_2601  | <i>ctaA</i>          | putative cytochrome aa3 controlling protein              | 392   | 201  | 55   | 277  |
| Synpcc7942_2602  | <i>ctaC</i>          | cytochrome c oxidase subunit II                          | 670   | 494  | 112  | 1543 |
| Synpcc7942_2603  | <i>ctaD</i>          | Cytochrome-c oxidase                                     | 251   | 258  | 60   | 898  |
| Synpcc7942_B2634 |                      | hypothetical protein                                     | 118   | 91   | 16   | 122  |
| Synpcc7942_B2645 |                      | hypothetical protein                                     | 19142 | 2537 | 1526 | 2072 |
| Synpcc7942_B2646 |                      | two-component sensor histidine kinase                    | 2269  | 388  | 269  | 241  |
| Synpcc7942_B2657 |                      | hypothetical protein                                     | 27    | 37   | 8    | 55   |

Table S3. Genes downregulated by (p)ppGpp across at least two RNA-seq comparisons.

| locus tag        | gene name               | gene description                                                           | RNA-seq expression values |                |           |                       |
|------------------|-------------------------|----------------------------------------------------------------------------|---------------------------|----------------|-----------|-----------------------|
|                  |                         |                                                                            | control-D                 | $\Delta$ ref-D | control-L | ppGpp <sup>+</sup> -L |
| Synpcc7942_0293  |                         | hypothetical protein                                                       | 2                         | 37             | 37        | 99                    |
| Synpcc7942_0358  | <i>dc13, dcl3, trmB</i> | tRNA (guanine-N(7))-methyltransferase                                      | 1                         | 9              | 11        | 15                    |
| Synpcc7942_0703  | <i>smf</i>              | DNA processing protein DprA, putative                                      | 97                        | 362            | 53        | 22                    |
| Synpcc7942_0718  |                         | hypothetical protein                                                       | 0                         | 1              | 2         | 3                     |
| Synpcc7942_0719  |                         | hypothetical protein                                                       | 0                         | 3              | 2         | 10                    |
| Synpcc7942_0724  |                         | hypothetical protein                                                       | 0                         | 1              | 1         | 3                     |
| Synpcc7942_0915  | <i>aroQ</i>             | 3-dehydroquinate dehydratase                                               | 21                        | 83             | 111       | 323                   |
| Synpcc7942_0919  |                         | hypothetical protein                                                       | 25                        | 151            | 134       | 191                   |
| Synpcc7942_0995  | <i>ycf20</i>            | conserved hypothetical protein YCF20                                       | 3                         | 27             | 24        | 16                    |
| Synpcc7942_1008  | <i>purU</i>             | formyltetrahydrofolate deformylase                                         | 2                         | 26             | 15        | 14                    |
| Synpcc7942_1165  |                         | hypothetical protein                                                       | 0                         | 1              | 1         | 3                     |
| Synpcc7942_1185  |                         | hypothetical protein                                                       | 8                         | 53             | 47        | 38                    |
| Synpcc7942_1186  | <i>ribD, ribG</i>       | putative riboflavin-specific deaminase                                     | 1                         | 10             | 9         | 6                     |
| Synpcc7942_1205  |                         | phage_integrase-like                                                       | 0                         | 2              | 2         | 4                     |
| Synpcc7942_1353  |                         | hypothetical protein                                                       | 5                         | 13             | 30        | 3                     |
| Synpcc7942_1471  |                         | hypothetical protein                                                       | 16                        | 22             | 241       | 67                    |
| Synpcc7942_1472  |                         | hypothetical protein                                                       | 29                        | 29             | 565       | 133                   |
| Synpcc7942_1473  | <i>ndhD5</i>            | putative monovalent cation/H <sup>+</sup> antiporter subunit D             | 10                        | 6              | 311       | 42                    |
| Synpcc7942_1474  |                         | putative monovalent cation/H <sup>+</sup> antiporter subunit C             | 8                         | 8              | 350       | 52                    |
| Synpcc7942_1475  | <i>sbtA</i>             | sodium-dependent bicarbonate transporter                                   | 247                       | 22             | 4472      | 569                   |
| Synpcc7942_1489  | <i>cmpB, ntrB</i>       | nitrate transport permease                                                 | 9                         | 3              | 92        | 36                    |
| Synpcc7942_1538  |                         | hypothetical protein                                                       | 0                         | 2              | 4         | 6                     |
| Synpcc7942_1547  |                         | hypothetical protein                                                       | 0                         | 7              | 4         | 11                    |
| Synpcc7942_1560  |                         | hypothetical protein                                                       | 2                         | 12             | 16        | 22                    |
| Synpcc7942_1564  |                         | hypothetical protein                                                       | 0                         | 5              | 4         | 5                     |
| Synpcc7942_1744  |                         | hypothetical protein                                                       | 22                        | 22             | 149       | 35                    |
| Synpcc7942_1970  |                         | N-acyl-L-amino acid amidohydrolase                                         | 1                         | 7              | 9         | 19                    |
| Synpcc7942_2085  |                         | probable anion transporting ATPase                                         | 16                        | 69             | 59        | 21                    |
| Synpcc7942_2194  |                         | hypothetical protein                                                       | 1                         | 12             | 8         | 27                    |
| Synpcc7942_2234  |                         | NADH dehydrogenase I subunit N                                             | 148                       | 146            | 794       | 110                   |
| Synpcc7942_2235  | <i>trmD</i>             | tRNA (guanine-N(1))-methyltransferase                                      | 46                        | 70             | 380       | 47                    |
| Synpcc7942_B2618 |                         | transcriptional regulator, BadM/Rrf2 family                                | 0                         | 2              | 2         | 11                    |
| Synpcc7942_B2620 | <i>srpA</i>             | putative catalase                                                          | 0                         | 3              | 2         | 7                     |
| Synpcc7942_B2623 | <i>srpD, cysK</i>       | cysteine synthase A                                                        | 0                         | 1              | 2         | 3                     |
| Synpcc7942_B2629 | <i>srpKLM</i>           | sulfonate ABC transporter, periplasmic sulfonate-binding protein, putative | 0                         | 1              | 1         | 1                     |
| Synpcc7942_B2641 |                         | hypothetical protein                                                       | 0                         | 3              | 2         | 8                     |
| Synpcc7942_B2663 | <i>srpH</i>             | putative serine acetyltransferase                                          | 0                         | 2              | 1         | 2                     |

Table S4. Plasmids and primers used in this study.

| <b>plasmid name</b>                        | <b>reference</b>                                                           |
|--------------------------------------------|----------------------------------------------------------------------------|
| pNS2 (Kan <sup>R</sup> )                   | Clerico, EM, Ditty, JL, and SS Golden (2007) Methods Mol Biol 362: 115-129 |
| pNS2-BSU11600                              | this study                                                                 |
| pNS2-BSU11600_D72G                         | this study                                                                 |
| pNS2-Synpcc7942_1377                       | this study                                                                 |
| pNS3 (Cm <sup>R</sup> )                    | Clerico, EM, Ditty, JL, and SS Golden (2007) Methods Mol Biol 362: 115-129 |
| pUC-ΔSynpcc7942_1377(rel)-Cm <sup>R</sup>  | this study                                                                 |
| pUC-ΔSynpcc7942_2352(hpf)-Kan <sup>R</sup> | this study                                                                 |
|                                            |                                                                            |
| <b>primer name</b>                         | <b>primer sequence</b>                                                     |
| <b>for plasmid construction</b>            |                                                                            |
| BSU11600-F-Bsal-GG                         | CACACCA GGTCTC A GTCC GATGACAAACAATGGGAGCG                                 |
| BSU11600-R-stop-Bsal-GG                    | CACACCA GGTCTC A CGCT CTATTGTTGCTCGCTTCCTT                                 |
| BSU11600-D72G-F-GG                         | CACACCA GGTCTC A GGTA TTGCTGGCCTTAGAATCATG                                 |
| BSU11600-D72G-R-GG                         | CACACCA GGTCTC A TACC CTGCATGGTTTCAATTTTCATGC                              |
| Synpcc7942_1377-F-Bsal-GG                  | CACACCA GGTCTC A GTCC cgcagcgggttgccg                                      |
| Synpcc7942_1377-R-stop-Bsal-GG             | CACACCA GGTCTC A CGCT tcacagctcatcatcgctgccg                               |
| rel-KO-up-F-Bsal-GG                        | CACACCA GGTCTC A CGCT ctggtcagcaagacttccagca                               |
| rel-KO-up-R-Bsal-GG                        | CACACCA GGTCTC A TACT cgaacgtgcatcgctcc                                    |
| rel-KO-down-F-Bsal-GG                      | CACACCA GGTCTC A TAGC tcactcagctatccaactgatg                               |
| rel-KO-down-R-Bsal-GG                      | CACACCA GGTCTC A GTCC ctggatctgaatccacacgatc                               |
| Cm <sup>R</sup> -F-Bsal-GG                 | CACACCA GGTCTC A AGTA cactggagcacctcaa                                     |
| Cm <sup>R</sup> -R-Bsal-GG                 | CACACCA GGTCTC A GCTA ctgccaccgctgagc                                      |
| hpf-KO-up-F-Bsal-GG                        | CACACCA GGTCTC A CGCT gtaacgaactgctgatactgg                                |
| hpf-KO-up-R-Bsal-GG                        | CACACCA GGTCTC A TACT aaatcgctcccagacaag                                   |
| hpf-KO-down1-F-Bsal-GG                     | CACACCA GGTCTC A TAGC tctcaactgatcaaccctttctcac                            |
| hpf-KO-down1-R-Bsal-GG                     | CACACCA GGTCTC A acga ccaccattggcctgcg                                     |
| hpf-KO-down2-F-Bsal-GG                     | CACACCA GGTCTC A tcgt ctctcggaagaggatggtttcg                               |
| hpf-KO-down2-R-Bsal-GG                     | CACACCA GGTCTC A GTCC cgcagaagcagcagttcatgg                                |
| Kan <sup>R</sup> -F-Bsal-GG                | CACACCA GGTCTC A AGTA agcttagatcgacctgacg                                  |
| Kan <sup>R</sup> -R-Bsal-GG                | CACACCA GGTCTC A GCTA gcgctgaggtctgctcgc                                   |
| <b>for qPCR</b>                            |                                                                            |
| Syn7942_2352-qPCR-F (hpf)                  | CCTTGGCACAGCTACAACCTAG                                                     |
| Syn7942_2352-qPCR-R (hpf)                  | CCTTCTCTGAGTTGCCTTCG                                                       |
| Syn7942_0900-qPCR-F (gifA)                 | TCGCGTGAACCTGGTGATG                                                        |
| Syn7942_0900-qPCR-R (gifA)                 | TGAATGGTGCCGTTGTAGTG                                                       |
| Syn7942_1475-qPCR-F (sbtA)                 | TCATCGGGTCAAATCTGGC                                                        |
| Syn7942_1475-qPCR-R (sbtA)                 | CCTTCGTAGACACTTTCTGGAC                                                     |
| Syn7942_2259-qPCR-F (rimM)                 | ATCTCTACATCGTGCAACTGG                                                      |
| Syn7942_2259-qPCR-R (rimM)                 | AAGACGTGAAATTCTCCCTCG                                                      |
| Syn7942_1615-qPCR-F (rnpA)                 | CTTCCCAGCACTGTATCGAG                                                       |
| Syn7942_1615-qPCR-R (rnpA)                 | CGCTTGTGAACTTTGAGACTG                                                      |
| Syn7942_0289-qPCR-F (secA)                 | CGAACGCTACTTTCATCCTTCAG                                                    |
| Syn7942_0289-qPCR-R (secA)                 | AGCCCTCACTCTTATACTCCAG                                                     |
| Syn7942_16SrRNA-qPCR-F                     | TGGAACGACTGCTAATACCC                                                       |
| Syn7942_16SrRNA-qPCR-R                     | TCATCCTCTCAGACCAGCTAC                                                      |
| Syn7942_pre-16SrRNA-qPCR-F                 | TGGGTTCTGGGAAAACCTTACG                                                     |
| Syn7942_pre-16SrRNA-qPCR-R                 | CGTTCGACTTGCATGTGTTAAG                                                     |

Table S5. Strains used in this study.

| Strain name                                            | Strain genotype                                                          | Resistance | Reference            |
|--------------------------------------------------------|--------------------------------------------------------------------------|------------|----------------------|
| <i>Synechococcus elongatus</i> PCC 7942 wild-type (WT) | WT                                                                       | –          | –                    |
| control (WT-Kan <sup>R</sup> )                         | pNS2                                                                     | Kan        | this study           |
| control (WT-Cm <sup>R</sup> )                          | pNS3                                                                     | Cm         | this study           |
| control (WT-Cm <sup>R</sup> /Kan <sup>R</sup> )        | pNS2 + pNS3                                                              | Cm, Kan    | this study           |
| ppGpp <sup>+</sup>                                     | pNS2-BSU11600                                                            | Kan        | this study           |
| ppGpp <sup>+</sup> D72G                                | pNS2-BSU11600_D72G                                                       | Kan        | this study           |
| $\Delta rel$                                           | $\Delta Synpcc7942\_1377$ -Cm <sup>R</sup>                               | Cm         | this study           |
| $\Delta rel$ (Cm <sup>R</sup> /Kan <sup>R</sup> )      | $\Delta Synpcc7942\_1377$ -Cm <sup>R</sup> + pNS2                        | Cm, Kan    | this study           |
| $\Delta rel + rel$                                     | $\Delta Synpcc7942\_1377$ -Cm <sup>R</sup> + pNS2-<br>$Synpcc7942\_1377$ | Cm, Kan    | this study           |
| $\Delta hpf$                                           | $\Delta Synpcc7942\_2352$ -Kan <sup>R</sup>                              | Kan        | this study           |
| <i>Escherichia coli</i> W3110 wild-type (CF1943)       | WT                                                                       | –          | Michael Cashel (NIH) |
| <i>E. coli</i> W3110 <i>relA251::Kan</i> (CF1944)      | <i>relA::Kan</i>                                                         | Kan        | Michael Cashel (NIH) |
